# Supplementary material for: 3D printing of porous structures by UV-curable O/W emulsion for fabrication of conductive objects
Source: Royal Society of Chemistry journal article supplement (doi:10.1039/c4tc02215g), 2015-01-01
Supplement: c4tc02215g1.pdf [file c4tc02215g1.pdf]

## 3D printing of porous structures by UV-curable O/W emulsion for fabrication of conductive objects

I. Cooperstein,<sup>a</sup> M. Layani<sup>a</sup> and S. Magdassi<sup>a</sup>

<sup>a</sup> Casali Center, Institute of Chemistry and the Center for Nanoscience and Nanotechnology, The Hebrew University of Jerusalem, Jerusalem, Israel 91904.

E-mail: [Magdassi@mail.huji.ac.il](mailto:Magdassi@mail.huji.ac.il)

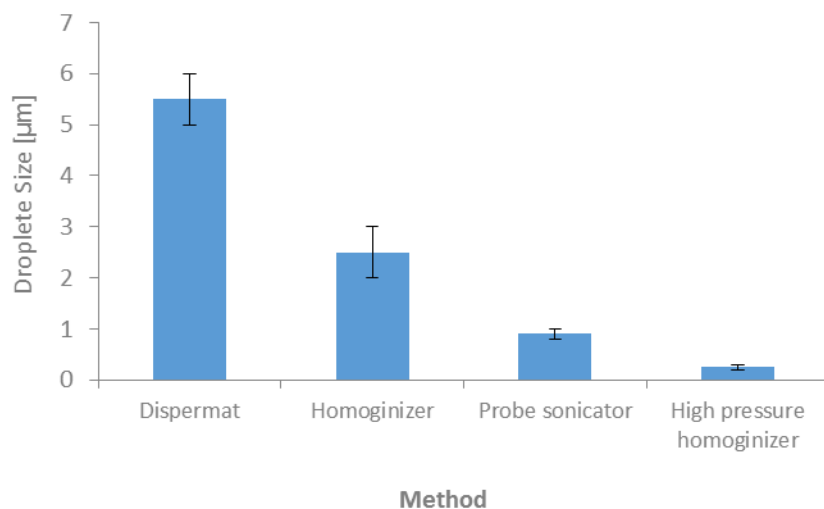

Fig. S1: The control over the droplet size as function of the homogenizing method.

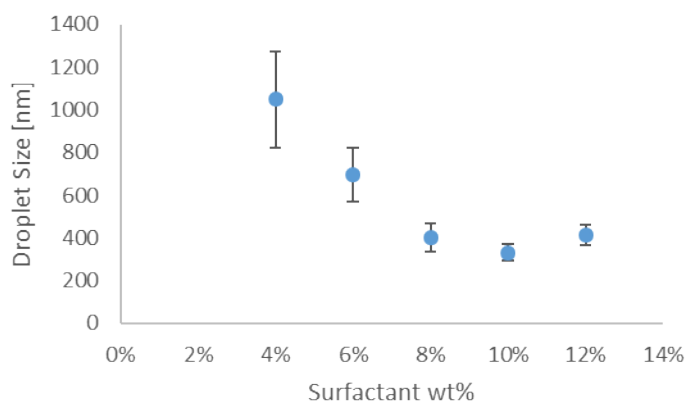

Fig. S2: A decrease in average droplet diameter size by increase of surfactant wt% in emulsion of 60 wt% oil phase homogenized by probe sonicator.

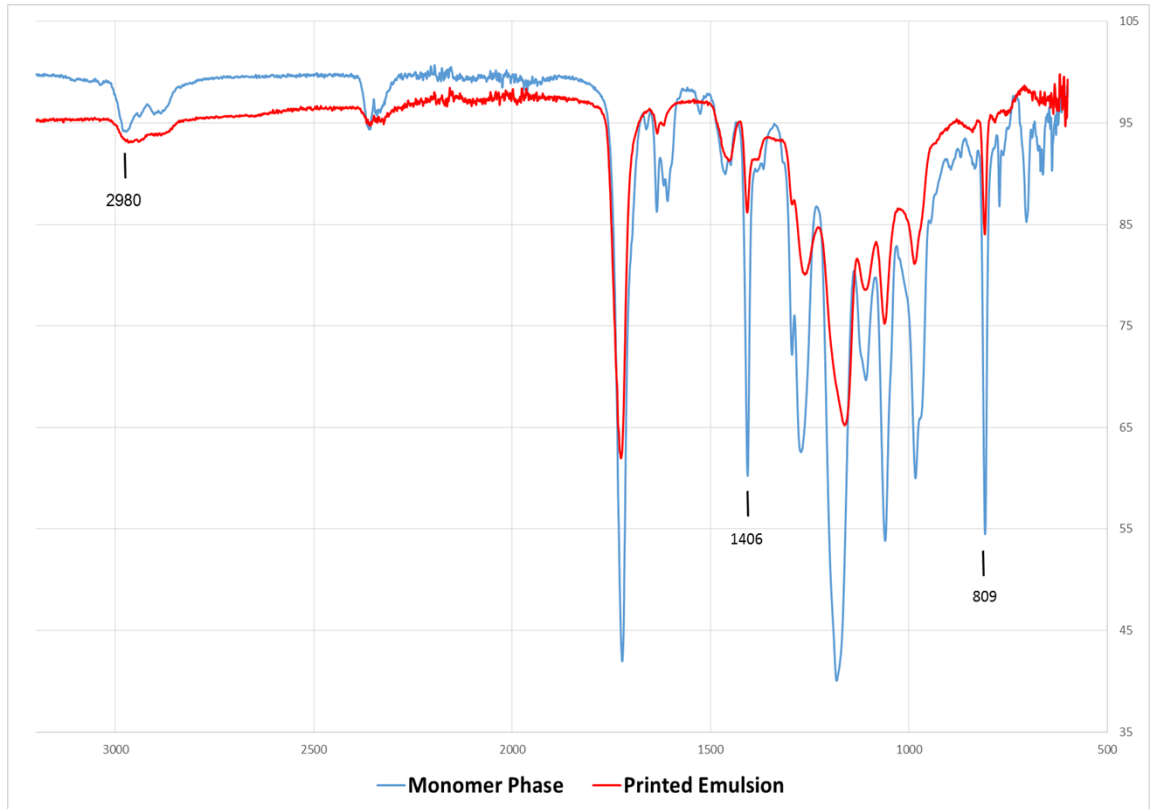

Fig. S3: ATR-FTIR spectrum of monomer phase of the emulsion before (—) and after (—) printing and washing with Iso Propyl Alcohol
